# Supplementary material for: A Systematic Computational Analysis of Biosynthetic Gene Cluster Evolution: Lessons for Engineering Biosynthesis
Source: PubMed Central journal article supplement (PMC4256081; doi:10.1371/journal.pcbi.1004016), 2014-12-04

## Core scaffold encoded in BGC:

- NRPS
- Oligosaccharide
- Type II PKS
- Eneidyne PKS
- Multimodular Type I PKS
- Aminocyclitol

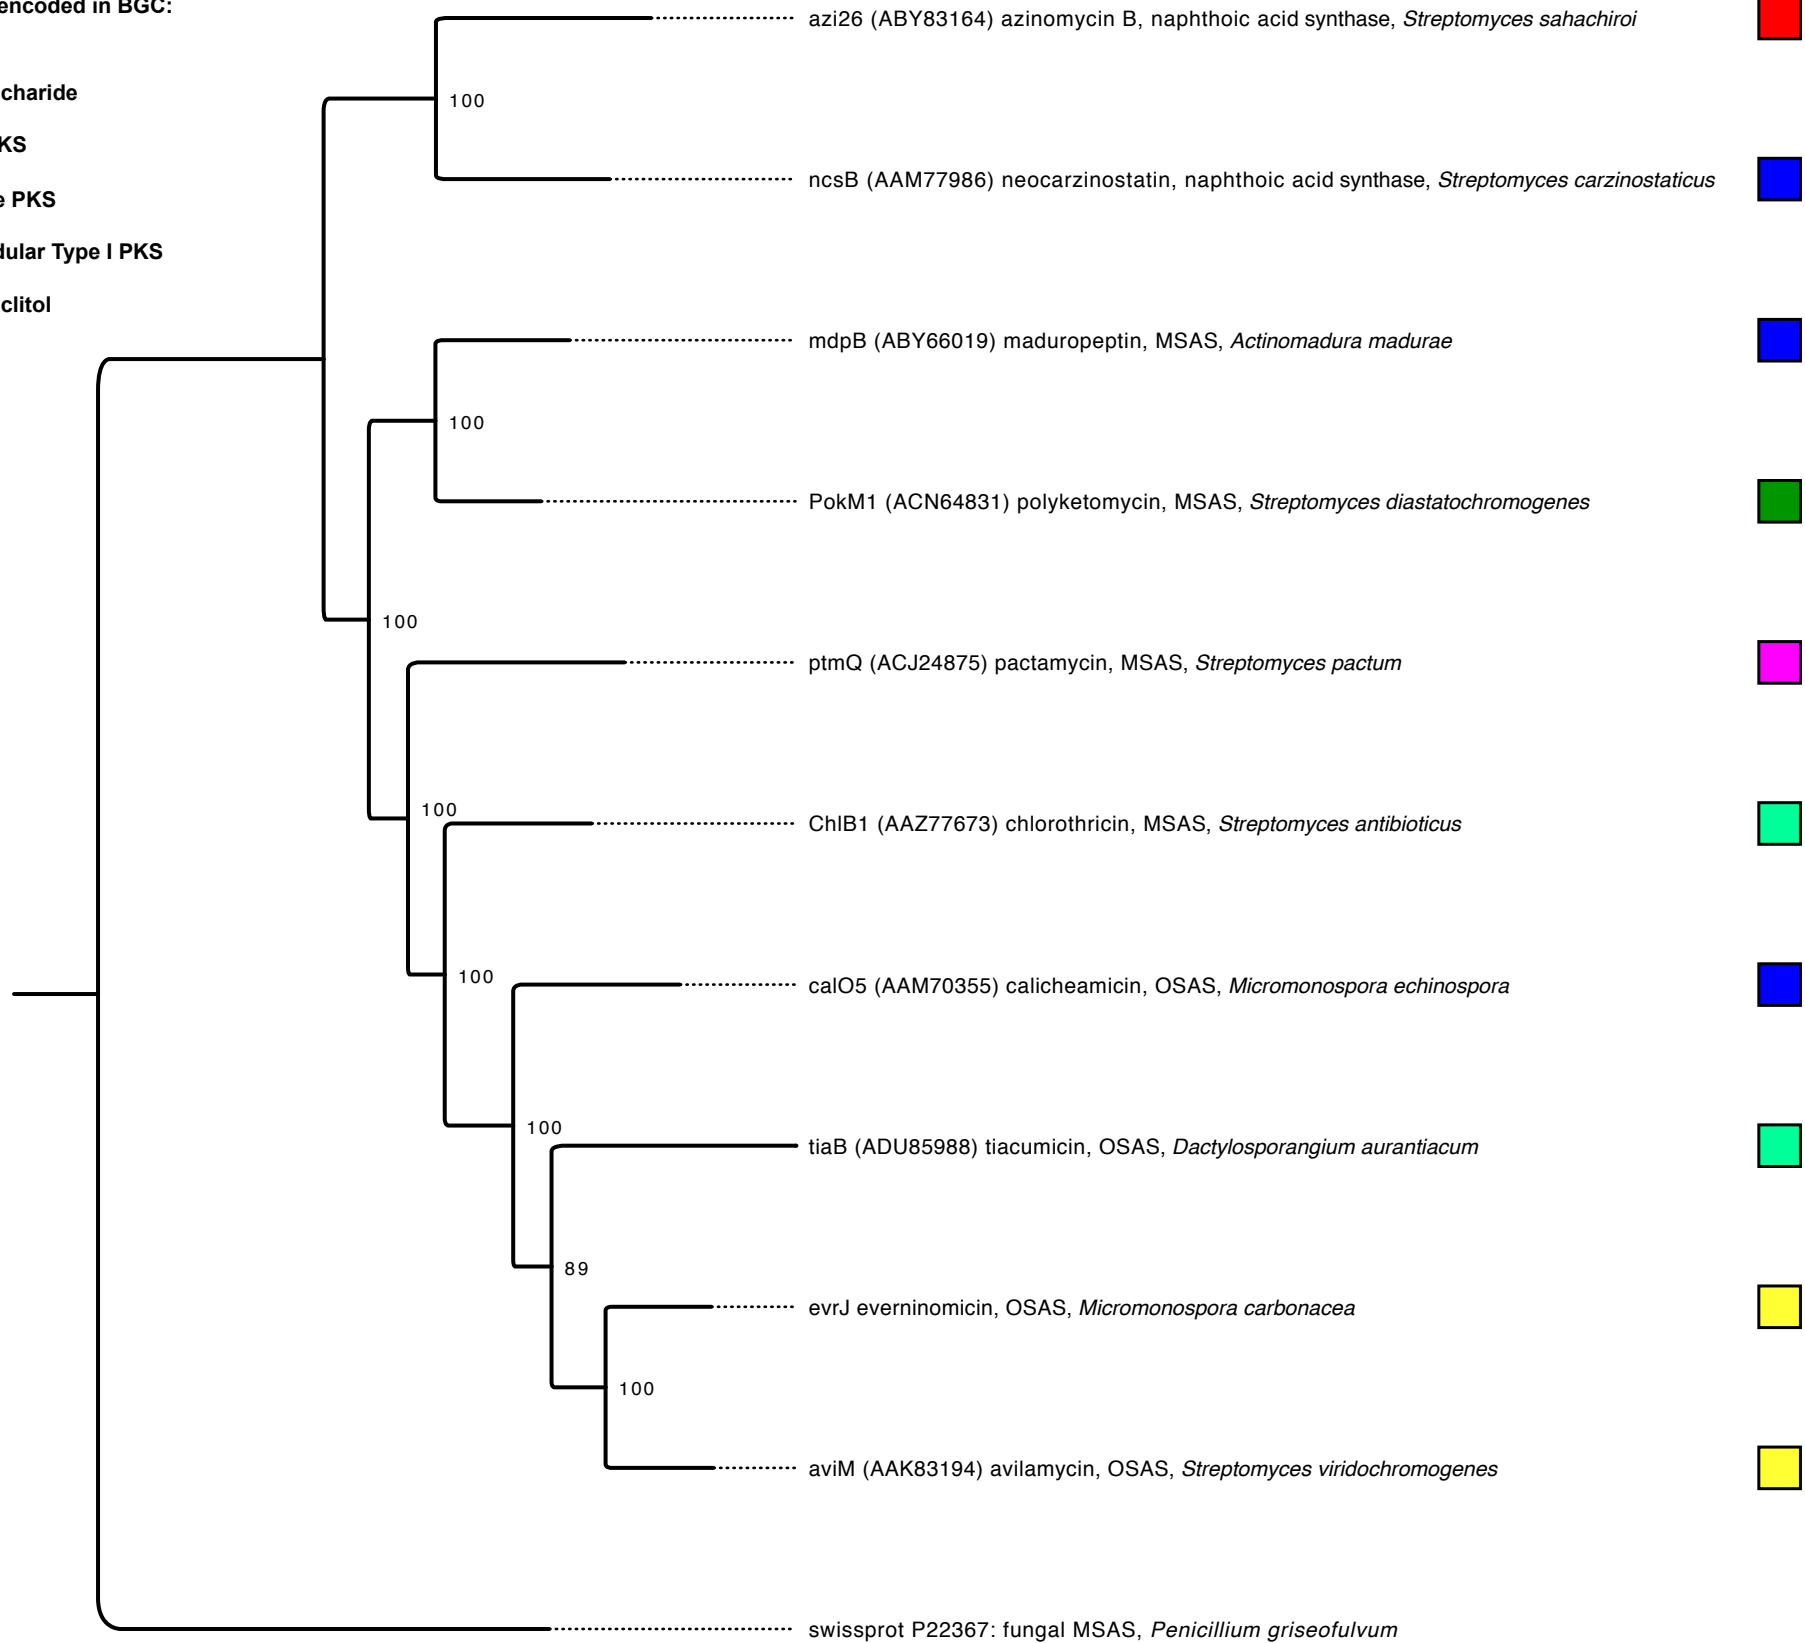

Supplement: pcbi.1004016.s004.pdf [file pcbi.1004016.s004.pdf]
