# Supplementary material for: A Systematic Computational Analysis of Biosynthetic Gene Cluster Evolution: Lessons for Engineering Biosynthesis
Source: PubMed Central journal article supplement (PMC4256081; doi:10.1371/journal.pcbi.1004016), 2014-12-04

Figure S9

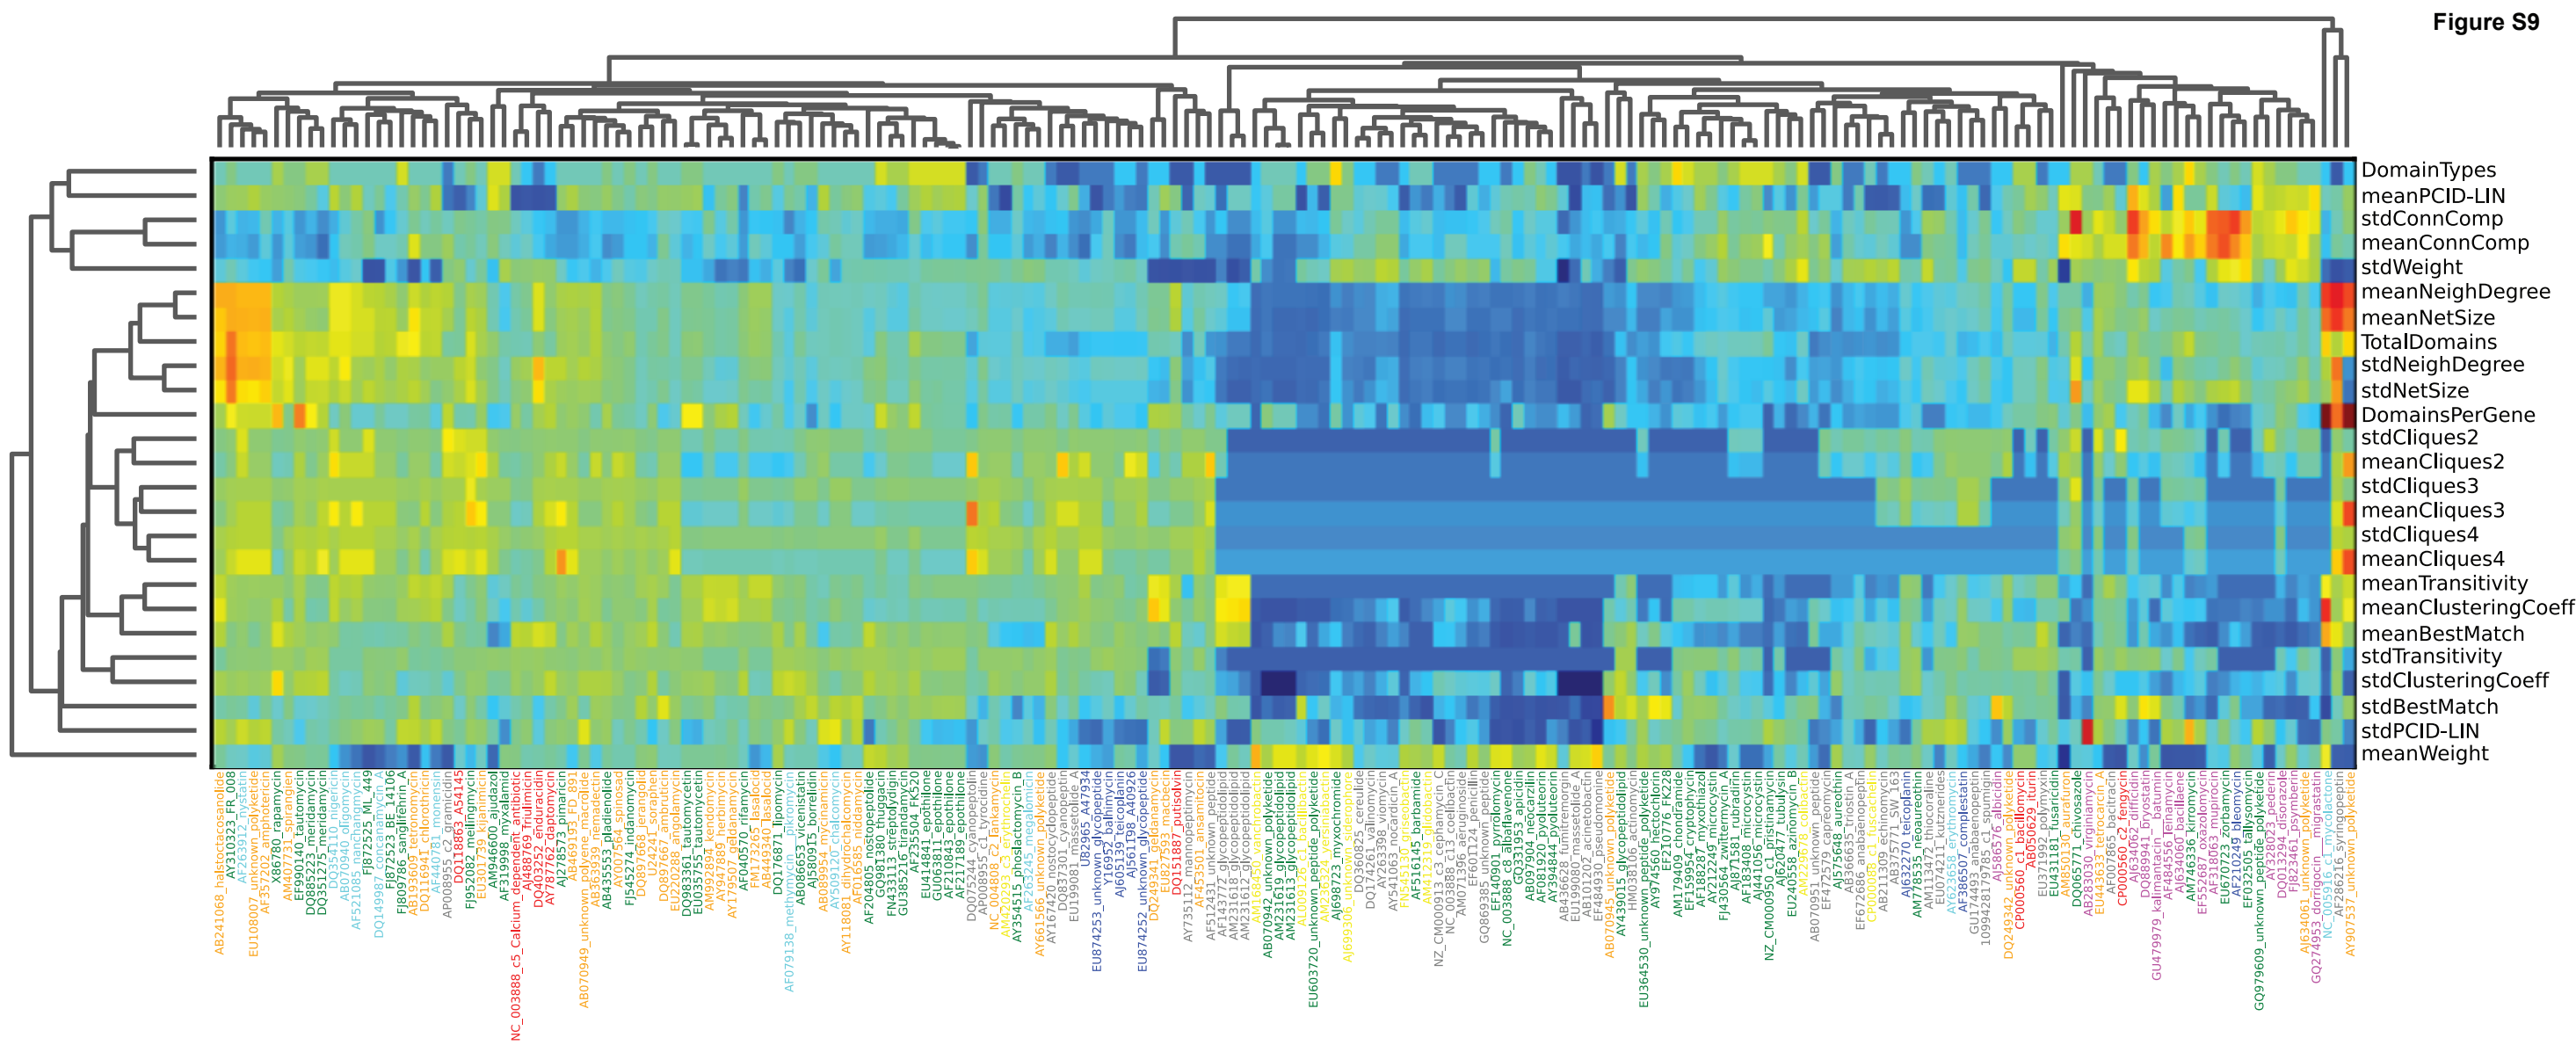

Supplement: pcbi.1004016.s009.pdf [file pcbi.1004016.s009.pdf]
